# Supplementary figures and images for: Using plant tannin as natural amphiphilic stabilizer to construct an aqueous–organic biphasic system for highly active and selective hydrogenation of quinoline
Source: Royal Society of Chemistry journal article supplement (doi:10.1039/c3cy00108c), 2013-01-01

## Supporting information

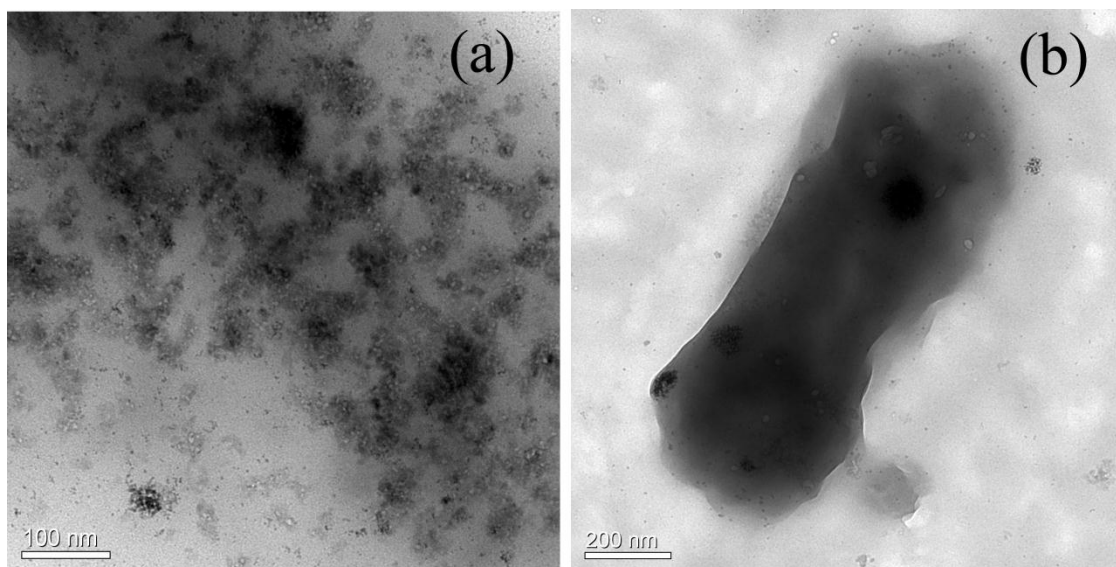

ESI, S1†. TEM images of BWT<sub>30mg</sub>-Pd (a) and BWT<sub>60mg</sub> (b).

Supplement: c3cy00108c.pdf [file c3cy00108c.pdf]
